# Supplementary material for: Effectiveness of a behavioural intervention involving regular weighing and feedback by community midwives within routine antenatal care to prevent excessive gestational weight gain: POPS2 randomised controlled trial
Source: PubMed Central journal article supplement (PMC6756421; doi:10.1136/bmjopen-2019-030174), 2019-09-17
Supplement: bmjopen-2019-030174supp001.pdf [file bmjopen-2019-030174supp001.pdf]

**Supplementary Table 1: Maternal and neonatal complications by group**

|                                |              | <b>Intervention</b> | <b>Usual care</b>  |
|--------------------------------|--------------|---------------------|--------------------|
| <b>Mother:</b>                 |              | N (%)               | N (%)              |
| Caesarean section              |              | 68/304 (22.4)       | 69/302 (22.8)      |
| Length of inpatient stay       | mean (sd)    | 1.7 (1.5) 305       | 1.7 (1.7) 306      |
|                                | median (IQR) | 1.0 (1.0 to 2.0)    | 1.0 (1.0 to 2.0)   |
| Maternal ICU admission         |              | n/a                 | n/a                |
| Preeclampsia                   |              | 6/315 (1.9)         | 8/317 (2.5)        |
| Pregnancy induced hypertension |              | n/a                 | n/a                |
| Gestational diabetes           |              | 12/315 (3.8)        | 17/317 (5.4)       |
| Maternal sepsis                |              | n/a                 | n/a                |
| Preterm delivery               |              | 17/304 (5.6)        | 14/302 (4.6)       |
| Miscarriage                    |              | 5/317 (1.6)         | 1/316 (0.3)        |
| Stillbirth                     |              | 0/316 (0)           | 1/316 (0.3)        |
| Shoulder dystocia              |              | 3/312 (1.0)         | 2/314 (0.6)        |
| <b>Baby:</b>                   |              |                     |                    |
| Treatment for jaundice         |              | 34/312 (10.9)       | 27/314 (8.6)       |
| Low Apgar score (<7) at 1 min  |              | n/a                 | n/a                |
| Low apgar score (<7) at 5 mins |              | 4/254 (1.6)         | 1/249 (0.4)        |
| Admission to NICU              |              | 26/261 (10.0)       | 21/262 (8.0)       |
| Neonatal death                 |              | n/a                 | n/a                |
| Neonatal sepsis                |              | n/a                 | n/a                |
| Gestational age (wks)          | mean (sd)    | 39.2 (2.1) 304      | 39.3 (1.6) 302     |
|                                | median (IQR) | 40 (39-40)          | 40 (38-40)         |
| Birth weight (g)               | mean (sd)    | 3348.6 (567.1) 304  | 3401.8 (550.7) 301 |
|                                | median (IQR) | 3373.5 (3060-3665)  | 3460 (3040-3745)   |

Supplementary Table 2: Per-protocol analysis

|                                                            | Intervention                          | Usual care                            | Intervention-Usual care |                               |         |
|------------------------------------------------------------|---------------------------------------|---------------------------------------|-------------------------|-------------------------------|---------|
|                                                            | Number exceeding IOM guideline/N\$(%) | Number exceeding IOM guideline/N\$(%) | % (95% CI)*             | Adjusted odds ratio (95% CI)* | P value |
| Women recorded weight weekly >70% of time during pregnancy | 7/46 (15.2)                           | 67/254 (26.4)                         | -9.2<br>(-26.3, 8.0)    | 0.58<br>(0.23, 1.47)          | 0.25    |
| Midwife overall accuracy for >70% appointments             | 8/42 (19.0)                           | 67/254 (26.4)                         | -5.9<br>(-28.0, 16.2)   | 0.71<br>(0.27, 1.88)          | 0.49    |
| Women weighing themselves 5 or more times during pregnancy | 18/95 (18.9)                          | 67/254 (26.4)                         | -7.0<br>(-23.2, 9.2)    | 0.68<br>(0.35, 1.33)          | 0.26    |

\$ Includes objective and self-reported weights

\*adjusted by Site, BMI category and midwife (random effect)
